# Supplementary material for: Src‐dependent phosphorylation of μ‐opioid receptor at Tyr336 modulates opiate withdrawal
Source: PubMed Central journal article supplement (PMC5666313; doi:10.15252/emmm.201607324), 2017-08-18

# Source data for Figure 1

1A

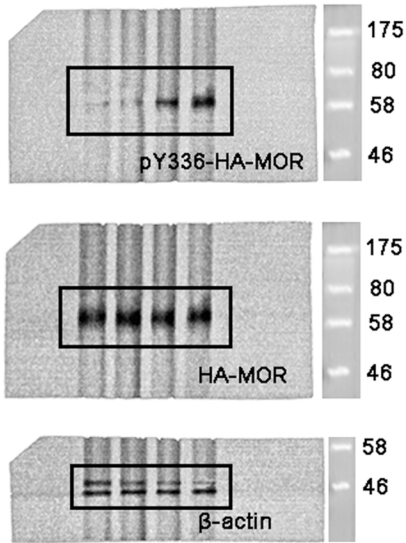

1B

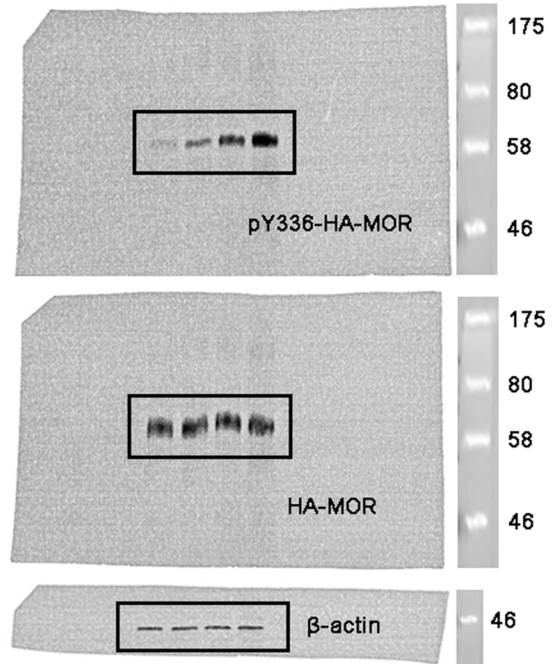

1C

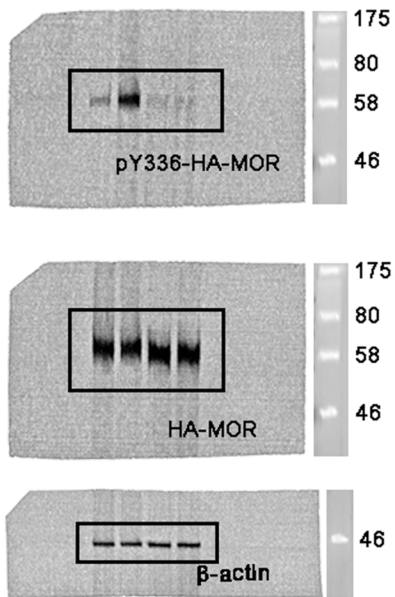

1D

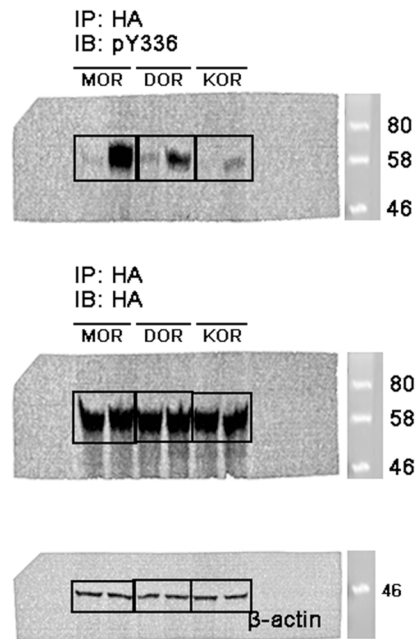

Supplement: EMMM-9-1521-s003.pdf [file EMMM-9-1521-s003.pdf]
