# Supplementary material for: Src‐dependent phosphorylation of μ‐opioid receptor at Tyr336 modulates opiate withdrawal
Source: PubMed Central journal article supplement (PMC5666313; doi:10.15252/emmm.201607324), 2017-08-18

# Source data for Figure 4A

## Naloxone-precipitated withdrawal WT mice

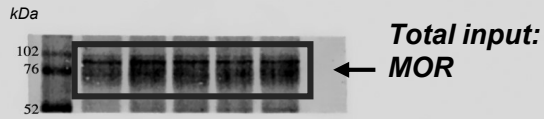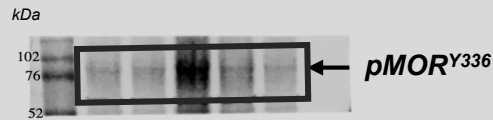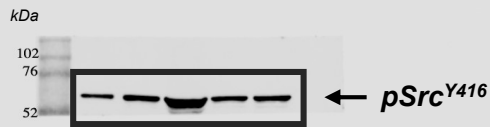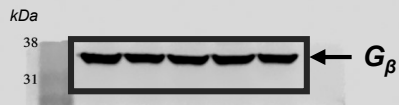

|                        |   |   |   |   |   |
|------------------------|---|---|---|---|---|
| <b>Placebo Pellet</b>  | + | + | - | - | - |
| <b>Morphine Pellet</b> | - | - | + | + | + |
| <b>Naloxone</b>        | + | + | + | + | - |
| <b>AZD0530</b>         | - | + | - | + | - |

## Pre-adsorption control

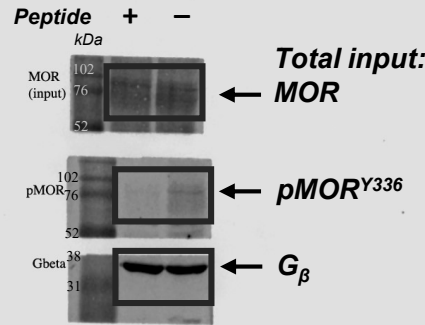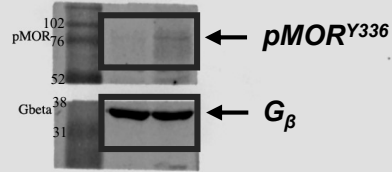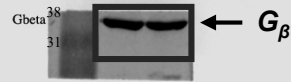

## Fyn<sup>-/-</sup>

LC Hippocampus

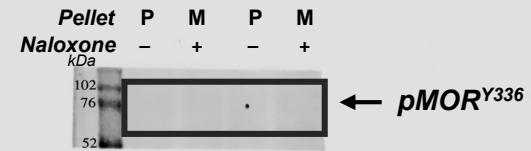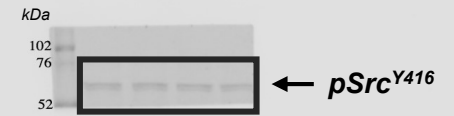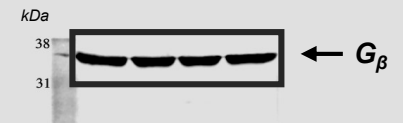

Supplement: EMMM-9-1521-s005.pdf [file EMMM-9-1521-s005.pdf]
