# Supplementary material for: Src‐dependent phosphorylation of μ‐opioid receptor at Tyr336 modulates opiate withdrawal
Source: PubMed Central journal article supplement (PMC5666313; doi:10.15252/emmm.201607324), 2017-08-18

# Source data for Figure 7D

Original scan for Figure 7D

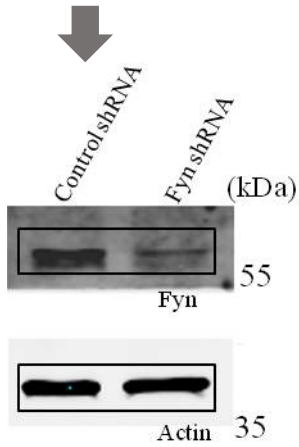

Same experiment: other uncropped and unprocessed scans with molecular weight markers.

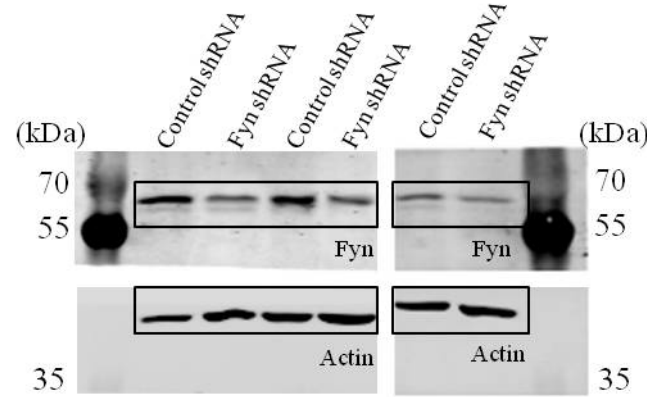

Same experiment: other uncropped and unprocessed scans with molecular weight markers.

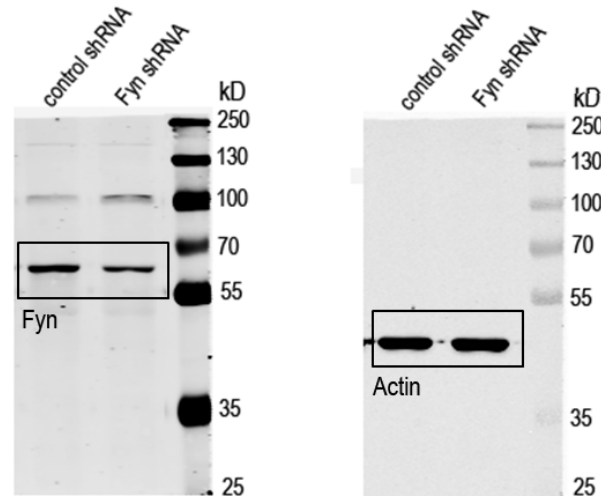

Supplement: EMMM-9-1521-s006.pdf [file EMMM-9-1521-s006.pdf]
